1  
2  
3  
4  
5  
6  
7  
  
8  
9  
10  
11  
12  
13  
  
14  
15  
16  
17  
18

**Genome comparisons indicate recent transfer of *w*Ri-like *Wolbachia* between sister species *Drosophila suzukii* and *D. subpulchrella***

William R. Conner\*, Mark L. Blaxter†, Gianfranco Anfora‡§, Lino Ometto‡<sup>1</sup>, Omar Rota-Stabelli‡, and Michael Turelli\*<sup>2</sup>

\*Department of Evolution and Ecology, University of California, One Shields Avenue, Davis, California 95616, USA

‡Institute of Evolutionary Biology and GenePool Genomics Facility, University of Edinburgh, Edinburgh EH9 3JT, UK

†Chemical Ecology Lab, Department of Sustainable Agro-ecosystems and Bio-resources, Fondazione Edmund Mach, San Michele all'Adige (TN), Italy

§Centre Agriculture Food Environment, University of Trento, San Michele all'Adige (TN), Italy

**Keywords:** spotted-wing *Drosophila*, introgression, horizontal transmission, molecular clocks, relative rates, cytoplasmic incompatibility loci

<sup>1</sup>Current address: Independent scientist ([lino.ometto@gmail.com](mailto:lino.ometto@gmail.com)), Mezzocorona (TN), Italy

<sup>2</sup>**Correspondence:** Michael Turelli, [mturelli@ucdavis.edu](mailto:mturelli@ucdavis.edu), Fax: 1-530-752-1449

**Running title:** *Wolbachia* transfer between sister species

1 April 2017

## 1 **Abstract**

2 *Wolbachia* endosymbionts may be acquired by horizontal transfer, by introgression between  
3 closely related species, or by cladogenic retention during speciation. All three modes of  
4 acquisition have been demonstrated, but their relative frequency is largely unknown. *Drosophila*  
5 *suzukii* and its sister species *D. subpulchrella* harbor *Wolbachia*, denoted *wSuz* and *wSpc*. These  
6 *Wolbachia* are very closely related to *wRi*, identified in California populations of *D. simulans*.  
7 Nevertheless, these variants differ in the phenotypes they induce: *wRi* causes significant  
8 cytoplasmic incompatibility (CI) in *D. simulans*, but CI has not been detected in *D. suzukii* or *D.*  
9 *subpulchrella*. Draft genomes of *wSuz* and *wSpc* show that they differ by only 0.004% in their  
10 coding sequences; they are sisters relative to *wRi*, from which they differ by 0.015%. Despite  
11 uncertainties about molecular divergence rates for *Drosophila* and *Wolbachia*, *wSuz* and *wSpc*  
12 are not plausible candidates for cladogenic transmission, as their divergence is too recent  
13 compared to their hosts' – by at least a factor of 100. These three *wRi*-like *Wolbachia* have  
14 different copy numbers of orthologs of genes postulated to contribute to CI, and also display  
15 several single nucleotide differences in the CI loci. These differences may account for the  
16 different levels of CI they produce. We discuss the general problem of distinguishing alternative  
17 modes of *Wolbachia* acquisition, focusing on the difficulties posed by limited knowledge of  
18 variation in rates of molecular evolution for host nuclear genomes, mitochondria and *Wolbachia*.

19

20

## 1 **Introduction**

2 *Drosophila suzukii* Matsumura (Diptera Drosophilidae) is an invasive and destructive fruit fly  
3 native to South East Asia that has recently invaded North America, South America and Europe  
4 (Hauser 2011; Cini *et al.* 2012; Rota-Stabelli *et al.* 2013). While most *Drosophila* species  
5 oviposit in fermenting fruits, *D. suzukii* and its close relative *D. subpulchrella* Takamori and  
6 Watabe use their atypical serrated ovipositors to pierce the skin of ripening soft fruits and lay  
7 eggs in them. Leveraging the genetic resources of *D. melanogaster*, *D. suzukii* and *D.*  
8 *subpulchrella* (both members of the *D. melanogaster* species group) are becoming model species  
9 for fundamental and applied studies.

10 *Wolbachia* are obligately intracellular, maternally inherited alpha-proteobacteria found in  
11 about half of all insects and many other terrestrial arthropods and nematodes (Weinert *et al.*  
12 2015). *Wolbachia* are often associated with reproductive manipulations, including cytoplasmic  
13 incompatibility (CI) (Hoffmann & Turelli 1997), male killing (Hurst & Jiggins 2000),  
14 feminization (Rousset *et al.* 1992) and parthenogenesis induction (Stouthamer *et al.* 1993), all of  
15 which enhance the relative fitness of infected females. But many *Wolbachia* infections, including  
16 those in *D. suzukii* and its sister species *D. subpulchrella*, cause no detectable reproductive  
17 manipulation and presumably persist by enhancing host fitness (Kriesner *et al.* 2013; Hamm *et al.*  
18 2014; Mazzetto *et al.* 2015; Kriesner *et al.* 2016; Cattel *et al.* 2016). Indeed, it seems  
19 increasingly plausible that even infections that cause reproductive manipulations establish in new  
20 hosts because they enhance fitness, and hence tend to increase in frequency even when very rare  
21 (Kriesner *et al.* 2013). For example, the most common *Wolbachia* reproductive manipulation is  
22 CI, in which embryos produced by uninfected females mated with infected males suffer  
23 increased mortality. Because CI is essentially irrelevant to the frequency dynamics of rare  
24 infections, initial spread of both CI-causing infections and infections that do not manipulate  
25 reproduction is likely to be driven by mutualistic effects such as fecundity enhancement (Weeks

1 *et al.* 2007), protection from viruses (Teixeira *et al.* 2008) and metabolic provisioning (Brownlie  
2 *et al.* 2009).

3 To understand why *Wolbachia* are found in so many species, it is critical to understand how  
4 *Wolbachia* infections are acquired and how long *Wolbachia*-host associations persist. As noted  
5 by Raychoudhury *et al.* (2008), although *Wolbachia* are maternally transmitted, lineages can  
6 acquire *Wolbachia* in three ways: by cladogenic transmission, in which an infection persists  
7 through speciation; by introgression, in which hybridization between closely related species  
8 leads to cytoplasm transfer; or by horizontal transmission, in ways that remain indeterminate, in  
9 which *Wolbachia* are transferred between closely or distantly related species through non-sexual  
10 mechanisms (such as predation or parasitism).

11 To complement an analysis of *Wolbachia* population biology and effects in *Drosophila*  
12 *suzukii* and its sister species *D. subpulchrella*, Hamm *et al.* (2014) presented a meta-analysis of  
13 *Wolbachia* infections in *Drosophila* species that addressed the frequency of both reproductive  
14 manipulation and alternative modes of acquisition. However, we suggest they may have  
15 underestimated the relative frequencies of horizontal and introgressive transmission compared to  
16 cladogenic retention. Horizontal transmission of *Wolbachia* between species was first  
17 demonstrated by extreme discordance of the phylogenies of distantly related hosts and their  
18 infecting *Wolbachia* (O'Neill *et al.* 1992). In contrast, horizontal transmission seems negligible  
19 within *D. simulans* (Turelli & Hoffmann 1995) and *D. melanogaster* (Richardson *et al.* 2012)  
20 populations. Hamm *et al.* (2014) implicitly assumed that if two closely related host species share  
21 closely related *Wolbachia*, the infections are likely to have been acquired by either cladogenic  
22 transmission or introgression. In particular, Hamm *et al.* (2014) postulated that because *D.*  
23 *suzukii* and its sister *D. subpulchrella* have concordant mitochondrial and nuclear phylogenies  
24 and harbor very similar *Wolbachia*, as indicated by identity at the Multi Locus Sequence Typing  
25 (MLST) loci used to classify *Wolbachia* (Baldo *et al.* 2006), cladogenic transmission of

1 *Wolbachia* was likely. Here we use comparative analyses of draft *Wolbachia* genomes, and  
2 extensive nuclear data from their *Drosophila* hosts (and relatives), to refute this hypothesis.

3 The three alternative modes of *Wolbachia* acquisition would be trivial to distinguish if  
4 reliable chronograms (dated phylogenies) for the nuclear, mitochondrial and *Wolbachia* genomes  
5 were available. Under cladogenic transmission, without subsequent introgression or horizontal  
6 transmission, concordant chronograms for all three genomes are expected. Under introgression  
7 without subsequent horizontal transmission, the mitochondrial and *Wolbachia* chronograms  
8 should be concordant and show more recent divergence than the bulk of the nuclear genome.  
9 Finally, under horizontal transmission, more recent divergence is expected between the  
10 *Wolbachia* than either the mitochondrial or nuclear genomes. These simple criteria are difficult  
11 to apply because of uncertainty concerning the relative rates of nuclear, mitochondrial and  
12 *Wolbachia* divergence. Here, using comparative data for *Wolbachia* and host divergence, we  
13 conclude that the *Wolbachia* in *D. suzukii* and *D. subpulchrella* are far too similar to make  
14 cladogenic transmission plausible.

15 In addition to assessing *Wolbachia* acquisition, we examine patterns of molecular evolution  
16 by comparing the relatively complete draft genomes for *wSuz* (Siozos *et al.* 2013) and *wSpc* (this  
17 paper) to the *wRi* reference genome (Klasson *et al.* 2009). We consider both a general pattern,  
18 namely, the relative frequencies of non-synonymous and synonymous substitutions, and  
19 sequence divergence for candidate loci associated with two *Wolbachia*-induced phenotypes, life  
20 shortening and CI. The “Octomom” duplication, which distinguishes *wMelPop* (Min & Benzer  
21 1997) from *wMel* (Wu *et al.* 2004), contains the genes *WD0507-WD0514* and is associated with  
22 extremely high *Wolbachia* titer and life shortening in *D. melanogaster* (Chrostek & Teixeira  
23 2015). Beckmann & Fallon (2013) used proteomics to identify the locus *wPip\_0282* in *wPip*, the  
24 *Wolbachia* found in *Culex pipiens*, as a candidate for producing CI. They found at least one  
25 homolog of this locus in several CI-causing *Wolbachia*, including *wMel* and *wRi*. Within *wPip*

1 and other *Wolbachia* genomes, *wPip\_0282* and each homolog seemed to be part of two-gene  
2 operons, with *wPip\_0282* adjacent to *wPip\_0283*. This pair is orthologous to *WD0631* and  
3 *WD0632* in *wMel*, and there are three homologous/paralogous pairs in *wRi*. Beckmann *et al.*  
4 (2017) and LePage *et al.* (2017) provide experimental and bioinformatic evidence that *WD0631*  
5 and *WD0632*, within the WO prophage, contribute to CI. We examine differences in homologs  
6 and paralogs of these loci among *wSuz*, *wSpc* and *wRi*.

7

## 8 **Materials and methods**

### 9 *Sequence data*

10 Genome data for *D. suzukii* and *D. subpulchrella* were generated by Edinburgh Genomics. The  
11 *D. suzukii* genome data were generated from an inbred Italian line (the Trento strain) as  
12 presented in Ometto *et al.* (2013), with the *Wolbachia*, *wSuz*, presented in Siozos *et al.* (2013).  
13 Two libraries of 180 and 300 base pairs were sequenced using 100-base, paired-end Illumina  
14 HiSeq 2000 sequencing. The *D. subpulchrella* genome data were generated from a stock  
15 maintained at the Fondazione Edmund Mach lab that was established from San Diego Stock  
16 center strain 14023-0401.00, originally from Japan. Two libraries of 350 and 550 base pairs were  
17 sequenced using 125-base, paired-end Illumina HiSeq 2500 sequencing.

18

### 19 *Assembly of Wolbachia in D. subpulchrella*

20 To assemble *wSpc*, we initially cleaned, trimmed and assembled reads for the *Wolbachia*-  
21 infected *D. subpulchrella* using Sickle (<https://github.com/najoshi/sickle>) and SOAPdenovo v.  
22 2.04 (Luo *et al.* 2012). For the assembly, *K* values of 31, 41, ... and 101 were tried; and the best  
23 assembly (fewest contigs and largest N50) was kept. This preliminary assembly had over  
24 100,000 contigs with a total length of 243 megabases. Details of the *D. subpulchrella* assembly  
25 will be published elsewhere, together with a comparison to the *D. suzukii* genome. Most of the  
26 contigs were identified through BLAST search as deriving from *Drosophila*. Minor

1 contamination from microbiota (such as *Acetobacter* spp.) was identified. Contigs with best  
2 nucleotide BLAST matches (with e-values less than  $10^{-10}$ ) to known *Wolbachia* sequences were  
3 extracted as the draft assembly for *wSpc*. The assembly and annotation of *wSub* are available  
4 from Genbank under accession XXXXX [to be advised].

5

#### 6 *Phylogeny and estimates of divergence of wSpc and wSuz*

7 The *Wolbachia* MLST loci *gatB*, *hcpA*, *coxA*, *fbpA*, and *ftsZ* (Baldo *et al.* 2006) were identified  
8 in the assemblies using BLAST. As reported in Hamm *et al.* (2014), the MLST sequences from  
9 *wSpc* and *wSuz* were identical both to each other and to those of the *wRi* reference genome from  
10 *D. simulans* (Klasson *et al.* 2009).

11 To distinguish these *Wolbachia* and determine their relationships, we extracted additional  
12 orthologous loci from the draft genomes. We annotated the genomes of *wSuz* and *wSpc* with  
13 Prokka v 1.11 (Seemann 2014). To normalize our comparisons, we also annotated the genomes  
14 of *wRi* (Klasson *et al.* 2009), *wAu* (Sutton *et al.* 2014) and *wMel* (Wu *et al.* 2004; Richardson *et*  
15 *al.* 2012). We selected 512 genes present in full length and single copy in all five genomes,  
16 avoiding incomplete or pseudogenes and loci with paralogs. The nucleotide sequences of the  
17 genes were aligned with MAFFT v. 7 (Katoh 2013) and concatenated, giving an alignment of  
18 480,831 bases. The strain phylogeny was estimated with MrBayes v. 3.2 (Ronquist &  
19 Huelsenbeck 2003) using the GTR+ $\Gamma$  model, partitioned by codon positions. We ran two  
20 independent chains, each with four incrementally heated subchains, for 1,000,000 generations.  
21 Trace files for each analysis were visualized in Tracer v. 1.6 (Rambaut *et al.* 2014) to ensure  
22 convergence of all continuous parameters. The first 25% of the generations were discarded as  
23 burn-in. Only one topology had posterior probability  $> 0.001$ .

24 To estimate the divergence between *wSuz* and *wSpc*, 703 genes present in full length and  
25 single copy in *wSuz*, *wSpc*, and *wRi* (spanning a total of 704,883 base pairs) were extracted and

1 aligned with MAFFT v. 7. The resulting alignments were concatenated and used to estimate an  
2 ultrametric tree under the GTR+ $\Gamma$  model with rate multipliers partitioned by codon using  
3 MrBayes v. 3.2. All model parameters for each codon position were allowed to vary  
4 independently, except topology and branch length. The age of the *wSuz-wSpc* node was set at 1.  
5 Each analysis was run as with the *Wolbachia* sequences.

6

7 *Nuclear divergence between D. subpulchrella and D. suzukii*

8 Hamm *et al.* (2014) used *Drosophila* nuclear data extracted from Yang *et al.* (2012) to assess the  
9 relationships of *D. suzukii*, *D. subpulchrella* and *D. biarmipes*, but these data have subsequently  
10 been shown to be unreliable (Catullo & Oakeshott 2014). We reassessed these relationships and  
11 compared the *Wolbachia* and nuclear chronograms for *D. suzukii* and *D. subpulchrella*. We  
12 identified complete coding regions for *D. melanogaster* for the ten nuclear loci used by Hamm *et al.*  
13 *al.* (2014) (*H2A*, *Adh*, *amylase*, *amyrel*, *cdc6*, *ddc*, *esc*, *hb*, *nucl*, and *ptc*) in FlyBase. Orthologs  
14 were then identified using BLAST in the *D. suzukii* assembly of Ometto *et al.* (2013), the  
15 unpublished draft *D. subpulchrella* assembly described above, a *D. biarmipes* assembly (Chen *et al.*  
16 *al.* 2014), and a second-generation *D. simulans* assembly (Hu *et al.* 2012). Data for *H2A* and  
17 *amylase* were eliminated because *H2A* had multiple non-identical paralogs in each species and  
18 homologs of *D. melanogaster amylase* could not be found in the assemblies. The coding  
19 sequence for the remaining eight loci were aligned with MAFFT v. 7 and concatenated. The  
20 alignment was used to estimate an ultrametric tree with MrBayes v. 3.2 under the GTR+ $\Gamma$  model  
21 with rate multipliers partitioned by codon. All model parameters for each codon position were  
22 allowed to vary independently, except topology and branch length. The age of the most recent  
23 common ancestor (MRCA) of *D. suzukii* and *D. subpulchrella* was set at 1, as an arbitrary  
24 scaling of relative ages. Each analysis was run as two independent chains, each with four  
25 incrementally heated subchains, for 1,000,000 generations. The first 25% of the generations were



1 discarded as burn-in. Trace files for each analysis were visualized in Tracer v. 1.6. To estimate  $k_s$   
2 and  $k_a$  between *D. suzukii* and *D. subpulchrella*, we used DNAsp v. 5.10 (Rozas 2009).

3 Following Hotopp *et al.* (2007), we looked for evidence of genetic transfer from *wSuz* and  
4 *wSpc* (or other *Wolbachia*) to these hosts. The *D. suzukii* and *D. subpulchrella* assemblies  
5 (including the *Wolbachia* contigs) were BLASTed against both all known *melanogaster* group  
6 nuclear sequences and all known *Wolbachia* sequences. We sought contigs for which part  
7 mapped to a *Drosophila* nuclear sequence and not to any *Wolbachia* sequence while another part  
8 mapped to a *Wolbachia* sequence and not to any *Drosophila* nuclear sequence.

9

#### 10 *Analysis of divergence between wSpc, wSuz and wRi*

11 The trimmed Illumina reads from *D. suzukii* and *D. subpulchrella* were aligned to the *wRi*  
12 reference (Klasson *et al.* 2009) with bwa 0.7.12 (Li & Durbin 2009). As a control, we also  
13 aligned Illumina reads from Riv84 (Iturbe-Ormaetxe *et al.* 2010), the *D. simulans* line used to  
14 make the *wRi* reference. Normalized read depth for each alignment was calculated over sliding  
15 1000 bp windows by dividing the average depth in the window by the average depth over the  
16 entire genome. Putative copy number variant (CNV) locations were identified with  
17 ControlFREEC 8.0 (Boeva *et al.* 2012), using 500 bp windows and the Riv84 alignment as a  
18 control. For the bulk of the genomes, we used an expected ploidy of one, but for variants  
19 involving sequences duplicated in *wRi*, we used a ploidy of two. We calculated *P*-values for each  
20 putative CNV using the Kolmogorov-Smirnov test implemented in ControlFREEC 8.0.

21 Sequences for the “Octomom” genes *WD0507-WD0514* (Chrostek & Teixeira 2015) were  
22 extracted from the *wMel* reference (Wu *et al.* 2004; Richardson *et al.* 2012) and orthologs  
23 identified in the *wRi* reference (Klasson *et al.* 2009) and the draft assemblies for *wSuz* and *wSpc*  
24 using BLAST.

1 Sequences homologous to loci putatively involved in CI in other *Wolbachia* strains  
2 (Beckmann & Fallon 2013; LePage *et al.* 2017; Beckmann *et al.* 2017) were extracted from *wRi*  
3 (Klasson *et al.* 2009) and the draft assemblies for *wSuz* and *wSpc*. Differences among these three  
4 genomes at these loci were assessed by aligning the *wSuz* and *wSpc* reads to the *wRi* reference  
5 and calculating the percentage of reads with the non-*wRi* base.

6 To unravel an insertion of the transposable element ISWpi7, which occurs in 21 identical  
7 copies in *wRi*, and differentiates *wSpc* and *wSuz* from *wRi*, an additional assembly step was  
8 required. The novel insertion occurs in the *wSpc* and *wSuz* orthologs of *WRi\_006720*, one of the  
9 CI-associated loci discussed below. The *D. sukuzii* and *D. subpulchrella* reads were aligned to  
10 the *wSpc* assembly with bwa 0.7.12 (Li & Durbin 2009). For both contigs that contain part of the  
11 *WRi\_006720* gene, reads mapping to the ISWpi7 transposable element plus the neighboring 500  
12 bp were extracted and assembled with SOAPdenovo v. 2.04 (Luo *et al.* 2012), using a K value of  
13 55. Both the *D. sukuzii* and *D. subpulchrella* reads assembled into a single contig containing the  
14 two pieces of *WRi\_006720* interrupted by a single copy of ISWpi7.

15

## 16 **Results**

17 *Draft genome assembly for wSpc, the Wolbachia from D. subpulchrella*

18 We generated a draft assembly of *wSpc* by filtering contigs from a joint *Wolbachia-D.*  
19 *subpulchrella* assembly. The draft *wSpc* assembly was in 100 contigs with N50 length of 31,871  
20 bp and total length 1.42 Mb. This length is close to the 1.45 Mb *wRi* reference (Klasson *et al.*  
21 2009), suggesting that it may represent a nearly complete genome.

22

23 *Wolbachia divergence*

24 We aligned and compared *wSpc* and *wSuz* at 703 protein-coding loci (704,883 bp) and identified  
25 only 28 single-nucleotide variants (SNV), an overall divergence of 0.004%. *wSuz* had 103 SNV

1 compared to  $w_{\text{Ri}}$  (0.015% divergence) and  $w_{\text{Spc}}$  99 SNV (0.014% divergence) (Table S1). Most  
2 (87) of these SNV are shared. There were too few differences to definitively determine whether  
3 these genomes are recombinant (Ellegaard *et al.* 2013), but the data were fully consistent with no  
4 recombination (i.e., with so few differences, we have no power to detect recombination).  
5 Bayesian phylogenetic analysis differentiated the three  $w_{\text{Ri}}$ -like variants, with  $w_{\text{Suz}}$  and  $w_{\text{Spc}}$   
6 sisters relative to  $w_{\text{Ri}}$  (Fig. 1A). For  $w_{\text{Suz}}$  and  $w_{\text{Spc}}$ , we derived point estimates and 95%  
7 confidence intervals for divergence at each codon position, calculated as the rate multiplier for  
8 that position times the branch length (fixed to 1) (Table 1). (Note: The model underlying this  
9 analysis assumes for computational convenience that all three codon positions undergo  
10 proportional rate variation across each branch, *i.e.*, each position speeds up or slows down by the  
11 same amount along each branch [cf. Langley & Fitch 1974]. The rate multipliers express the  
12 relative rate of evolution for each codon position. Hence, the expected number of substitutions  
13 for each codon position along each branch of the phylogram is the branch length times the rate  
14 multiplier for that position.) The estimated chronogram (Fig. 1B) shows that the divergence time  
15 of  $w_{\text{Ri}}$  from its MRCA with  $w_{\text{Spc}}$  and  $w_{\text{Suz}}$  is 3.51 times the divergence time of  $w_{\text{Spc}}$  and  $w_{\text{Suz}}$ ,  
16 with a 95% confidence interval of (2.41, 4.87). We found no difference in the rates of divergence  
17 for first, second and third codon positions, as also observed in the codivergence of *Wolbachia*  
18 and mtDNA haplotypes in *D. melanogaster* (Richardson *et al.* 2012). Following from this,  
19 estimates of  $k_s$  and  $k_a$  were very similar (Table 1).

20

### 21 *Host divergence*

22 The host chronogram (Fig. 1C) shows that *D. subpulchrella* and *D. suzukii* are sisters relative to  
23 *D. biarmipes*, as reported by Hamm *et al.* (2014). The divergence time of *D. biarmipes* from its  
24 MRCA with *D. subpulchrella* and *D. suzukii* was estimated to be 2.19 times the divergence time  
25 for *D. subpulchrella* and *D. suzukii*, with 95% confidence interval (2.00, 2.40). The *D.*

1 *subpulchrella*-*D. suzukii* divergence time estimate is 1.15 times as large as the estimated  
2 divergence time for *D. melanogaster* and *D. simulans*, with a 95% confidence interval of (1.03,  
3 1.31). Point estimates and 95% confidence intervals for divergence at each codon position  
4 between *D. subpulchrella* and *D. suzukii* were calculated as the rate multiplier for that position  
5 times the branch length (fixed to 1) (Table 2).

6 We found no evidence for partial integration of any *Wolbachia* sequence into the nuclear  
7 genomes of either *D. subpulchrella* or *D. suzukii*.

8

### 9 *Calibrations for Wolbachia versus host genome divergence and interpretation*

10 We used estimates of relative divergence of the *Wolbachia* and *Drosophila* genomes to  
11 assess cladogenic versus lateral transmission of *wSpc* and *wSuz*. Our strategy was to compare  
12 our estimates of relative *Wolbachia*/host divergence to ratios obtained from published examples  
13 of cladogenic *Wolbachia* transmission. Table 3 summarizes our data and the data from two  
14 *Nasonia* wasp species (Raychoudhury *et al.* 2008, *wNlonB1* versus *wNgirB*) and four *Nomada*  
15 bee species (Gerth & Bleidorn 2016, plus unpublished data kindly provided by the authors). Our  
16 ratio of *Wolbachia* to host silent-site divergence estimates is two or three orders of magnitude  
17 lower than found for *Nasonia* or *Nomada*. This strongly indicates relatively recent *Wolbachia*  
18 transfer between *D. suzukii* and *D. subpulchrella* rather than cladogenic *Wolbachia* acquisition.  
19 Given that we are looking at only single exemplars of *wSpc* and *wSuz*, the divergence times for  
20 these sequences provides an upper bound for the time of interspecific transfer (Gillespie &  
21 Langley 1979). Additional support for non-cladogenic transmission comes from the analyses of  
22 Richardson *et al.* (2012), who inferred that *Wolbachia* substitution rates were roughly ten-fold  
23 lower than the non-coding nuclear mutation rate for *D. melanogaster*, which is often considered  
24 a reasonable approximation for the rate of third-position substitutions (at least for four-fold

1 degenerate sites, Obbard *et al.* (2012)). This is clearly inconsistent with the three-order-of-  
2 magnitude difference we estimate (Table 3).

3 Comparing  $w_{\text{Suz}}$  and  $w_{\text{Spc}}$ , we found no difference in synonymous versus nonsynonymous  
4 substitution rates (Table 1). This is also true for  $w_{\text{Mel}}$  variation in *D. melanogaster* (Richardson  
5 *et al.* 2012). Gerth & Bleidorn (2016, pers. comm.) find essentially identical estimates of  $k_s$  and  
6  $k_a$  for all pairwise comparisons of the *Wolbachia* in the clade (*N. leucophthalma*, *N. flava*), *N.*  
7 *panzeri*). In contrast, comparing  $w_{\text{Ri}}$  and  $w_{\text{Au}}$  using the 429,765 bp dataset of single-copy, full-  
8 length genes (Table S1), we estimate a synonymous substitution frequency of 4.34%; whereas  
9 the estimated nonsynonymous frequency is only 0.65% (or  $k_s/k_a = 6.7$ ). Similarly, when  
10 comparing the *Wolbachia* of the outgroup host, *N. ferruginata*, to the *Wolbachia* of the three  
11 ingroup species, Gerth & Bleidorn (2016, pers. comm.) observed  $k_s/k_a = 2.8, 2.8$  and  $2.5$ . In their  
12 comparisons of  $w_{\text{NlonB1}}$  and  $w_{\text{NgirB}}$  from *N. longicornis* and *N. giraulti*, Raychoudhury *et al.*  
13 (2008) estimated  $k_s/k_a = 0.0037/0.0022 = 1.7$ . Our data and those from other very recently  
14 diverged *Wolbachia* are consistent with either accelerated adaptive *Wolbachia* evolution in a new  
15 host or a relaxation of constraints on non-synonymous substitutions.

16 Estimation of absolute divergence times (i.e., times to the MRCA) for  $w_{\text{Suz}}$  and  $w_{\text{Spc}}$  and  
17 their hosts is more difficult. Assuming 10 generations per year and the  $w_{\text{Mel}}$ -derived estimate of  
18 the 95% confidence interval for the third-position substitution rate of *Wolbachia* ( $2.88 \times 10^{-10}$ ,  
19  $1.29 \times 10^{-9}$ ) changes/site/generation; Richardson *et al.* 2012),  $w_{\text{Suz}}$  and  $w_{\text{Spc}}$  diverged about  
20 1,600 to 7,000 years ago. Using the 95% confidence interval for first- and second-position  
21 substitution rates from Richardson *et al.* (2012) yields  $w_{\text{Suz}}$ - $w_{\text{Spc}}$  divergence dates of 1,200 to  
22 9,100 years. (Given that *D. sukuzii* and *D. subpulchrella* seem to be temperate species [Takamori  
23 *et al.* 2006; Ometto *et al.* 2013], the number of generations per year may be overestimated by a  
24 factor of two, which would inflate the *Wolbachia* divergence time by a factor of two. This does  
25 not affect our conclusions.) Raychoudhury *et al.* (2008) estimated a *Wolbachia* synonymous rate

1 of  $4.7 \times 10^{-9}$  changes/synonymous site/year in *Nasonia*. Using our synonymous rate from Table 1  
2 with the *Nasonia* calibration, the estimated divergence for *wSuz* and *wSpc* is 6,400 years, which  
3 is consistent with our *Drosophila* calibration. These analyses suggest that *wSuz* and *wSpc*  
4 diverged on the order of 1,000-10,000 years ago, orders of magnitude shorter than typical time  
5 scales for *Drosophila* speciation ( $10^5$ - $10^6$  years, Coyne & Orr 2004, p. 75; Obbard *et al.* 2012).  
6 Molecular estimates of *Drosophila* divergence times generally depend on speculative inferences  
7 from the phylogeography of the Hawaiian *Drosophila* radiation (Obbard *et al.* 2012). Using the  
8 Obbard *et al.* (2012) summary of available estimates for *D. melanogaster* and *D. simulans*  
9 divergence and our relative chronogram for *D. subpulchrella* and *D. suzukii* (Fig. 1C), we infer  
10 divergence times for *D. subpulchrella* and *D. suzukii* ranging from about one to nine million  
11 years, two orders of magnitude larger than our estimates for *wSuz* versus *wSpc*. Hence, despite  
12 great uncertainties, our data clearly preclude cladogenic transmission of *wSuz* and *wSpc*.

13

#### 14 *Genome differences between wSpc, wSuz and wRi: structural variation and candidate genes*

15 We identified copy-number variants (CNV) in *wSuz* and *wSpc* relative to the *wRi* reference  
16 sequence by plotting read depth along each genome (Fig. 2; Table 4). *wSpc* and *wSuz* share a  
17 deletion relative to *wRi* of 23,000 bp, between positions 733,000-756,000. *wSuz* has duplications  
18 22,500 bp long from about 570,000 to 592,500 and 1,077,500 to 1,100,000. Both regions are part  
19 of the WO-B prophage. In *wRi*, there are two nearly identical copies (99.4%) of WO-B, from  
20 about 565,000 to 636,000 and from about 1,071,000 to 1,142,000 (Klasson *et al.* 2009). *wSuz*  
21 had an additional duplication between 1,345,000 and 1,347,500, outside of the WO prophage  
22 regions (Table 4).

23 We identified homologs in our target *Wolbachia* genomes of loci implicated in producing  
24 phenotypic effects. The Octomom phenotype of *wMel* (shortened life, high *Wolbachia* titer) is  
25 associated with eight loci (*WD0507-WD0514*, Chrostek & Teixeira 2015). In the *wRi* reference,

1 we found homologs of only *WD0508* and *WD0509*. There were two *WD0508*-like genes, at  
2 632,500-633,385 and 1,138,959-1,139,844, within the *wRi* WO-B prophages. A single *WD0509*-  
3 like gene was present, from 1,419,589-1,421,396, not associated with WO-B prophage. These  
4 two genes are not neighbors in *wRi* and are not within regions that differentiate *wSpc* and *wSuz*  
5 from *wRi*.

6 Table 5 lists the orthologs and paralogs in *wMel*, *wRi*, *wSuz* and *wSpc* of *wPip\_0282* and  
7 *wPip\_0283*, the loci originally identified as CI-causing by Beckmann & Fallon (2013) in *wPip*,  
8 the *Wolbachia* in *Culex pipiens*. These loci occur in pairs; and the “type I” pairs, orthologs of  
9 *wPip\_0282* and *wPip\_0283*, may be a toxin-antidote operon (cf. Beckmann *et al.* 2017; LePage  
10 *et al.* 2017). The orthologs in *wMel* are *WD0631* and *WD0632*. As shown in Table 5, there are  
11 two copies of the type I pair in *wRi*, one copy in each of the two complete copies of the WO-B  
12 prophage. As noted by Beckmann & Fallon (2013), in *wRi*, there is also a paralogous pair  
13 (*wRi\_006720* and *wRi\_006710*), termed “type II” by LePage *et al.* (2017), that exists within what  
14 they term a “WO-like island.”

15 Table S4 lists genes included in the CNV regions of *wSuz* and *wSpc* relative to *wRi*.  
16 Notably, the orthologs of *WD0631* and *WD0632*, implicated in causing CI (Beckmann & Fallon  
17 2013; LePage *et al.* 2017; Beckmann *et al.* 2017), are in a partial third copy of prophage WO-B  
18 found in *wSuz*. Hence, *wSuz* contains three copies of these two loci, whereas *wSpc* has two (see  
19 Table 5). The copy-number variants in *wSuz* or *wSpc* do not affect the type II loci.

20 Table 6 reports differences among *wRi*, *wSuz* and *wSpc* at orthologs of the CI-associated  
21 loci *WD0631*, *WD0632*, *WRi\_006710*, and *WRi\_006720*. The duplicate orthologs of *WD0631* in  
22 *wRi* are *WRi\_005370* and *WRi\_010030*. As noted by Beckmann & Fallon (2013), the (duplicate)  
23 orthologs of *WD0632* in *wRi* have been annotated as pseudogenes, *WRi\_p005380* and  
24 *WRi\_p010040*, because of premature stop codons; but they retain large, intact coding regions  
25 intact and may be functional. Even with multiple orthologs of *WD0631* and *WD0632* in each



1 genome (two in *wRi*, two in *wSpc*, three in *wSuz*), all copies within each genome are identical  
2 and all interspecific comparisons consistently show the single nucleotide differences reported in  
3 Table 6. *wSuz* and *wSpc* share two missense substitutions in *WD0631* and one in *WD0632*. As  
4 shown in Table 6, *wSuz* and *wSpc* also share one missense substitution in *wRi\_006710*. This  
5 indicates that the duplications unique to *wSuz* occurred after the split of (*wSuz*, *wSpc*) from *wRi*.  
6 *wSpc* has a nonsense mutation at position 3,353 of *WD0632*, which results in a protein lacking  
7 the last 56 amino acids produced in *wRi*. These differences may account for the fact that while  
8 *wRi* causes appreciable CI in *D. simulans* and detectable CI in *D. melanogaster*, neither *wSuz*  
9 nor *wSpc* causes detectable CI in its native host (Hamm *et al.* 2014).

10 In both *wSpc* and *wSuz*, an IS element, identical to ISWpi7 of *wRi* (Klasson *et al.* 2009,  
11 Table S5), has inserted before base 323 of the ortholog to *WRi\_006720*. There are 21 identical  
12 copies of the ISWpi7 transposon in *wRi*, each 1480 bp long with the transposase gene flanked on  
13 each side by about 200 bp. Clearly, this insertion predates the divergence of *wSpc* and *wSuz*.  
14

## 15 Discussion

### 16 Genomic data indicate non-cladogenic acquisition of *wSuz* and *wSpc*

17 Despite considerable uncertainty in divergence-time estimates for both *wSuz* and *wSpc* and their  
18 hosts, *D. sukukii* and *D. subpulchrella*, genomic data on relative rates of *Wolbachia* and host  
19 divergence contradict the conjecture by Hamm *et al.* (2014) that these species share similar  
20 *Wolbachia* because of cladogenic transmission. Based on this result, we must also revisit the  
21 Hamm *et al.* (2014) conclusion that cladogenic transmission of *Wolbachia* may be relatively  
22 common among *Drosophila*. That conclusion was based on the erroneous assumption that  
23 cladogenic transmission was the most plausible explanation for sister species sharing very  
24 similar *Wolbachia*. Given that on the order of half of *Drosophila* speciation events show  
25 evidence for reinforcement (i.e., accelerated rates of evolution for premating isolation associated  
26 with overlapping ranges) (Coyne & Orr 1989, 1997; Turelli *et al.* 2014), hybridization is



1 apparently common among sister species of *Drosophila*. Introgression has been invoked to  
2 explain the closely related *Wolbachia* found within the *simulans* and *yakuba* clades in the *D.*  
3 *melanogaster* subgroup (Rousset and Solignac 1995; Lachaise *et al.* 2000). In both cases, the  
4 introgression hypothesis is favored over horizontal transmission because the hosts also share  
5 essentially identical mitochondrial DNA. *Wolbachia* transmission within the *yakuba* clade is  
6 currently being reanalyzed using complete *Wolbachia*, mitochondrial and nuclear genomes  
7 (Turelli, Conner, Turissini, Matute and Cooper, in prep.).

8  
9 *Extremely variable rates of Wolbachia molecular evolution seem an implausible alternative*  
10 Gerth & Bleidorn (2016) have proposed a time scale for *Wolbachia* evolution based on the  
11 apparent co-divergence of *Wolbachia* and nuclear genomes in a clade of four *Nomada* bee  
12 species. In our discussion of their data above, we emphasized comparisons between the outgroup  
13 host *N. ferruginata* and the three ingroup hosts, noting that the co-divergence of these hosts and  
14 their *Wolbachia* produced relative rates of molecular divergence comparable to those inferred for  
15 a pair of *Nasonia* (Raychoudhury *et al.* 2008) and for *D. melanogaster* (Richardson *et al.* 2012).  
16 However, if we consider instead the sister species *N. leucophthalma* and *N. flava* from Gerth &  
17 Bleidorn (2016), we would infer much slower divergence of their *Wolbachia* (which recently  
18 acquired a biotin synthesis operon). For *N. leucophthalma* and *N. flava*, Gerth & Bleidorn (2016,  
19 pers. comm.) estimated synonymous nuclear substitution rates of  $6.8 \times 10^{-3}$ , with a corresponding  
20 *Wolbachia* synonymous substitution rates of only  $1.0 \times 10^{-4}$ . Under cladogenic transmission, this  
21 implies *Wolbachia* divergence that is roughly an order of magnitude slower than inferred from  
22 the three outgroup comparisons, with *Wolbachia* divergence at  $1/68^{\text{th}}$  the rate of the host nuclear  
23 genomes rather than  $1/8$ . This indicates either 8.5-fold rate variation for *Wolbachia* molecular  
24 evolution or that cladogenic transmission does not apply to this sister pair.

1 To explain our *D. suzukii* and *D. subpulchrella* data with cladogenic transmission and  
2 relative rate heterogeneity, we require that *Wolbachia* divergence is more than 1000-fold slower  
3 than third-position nuclear divergence. This relative rate is 100-fold slower than inferred for *D.*  
4 *melanogaster* and 30-fold slower than the slow rate implied by cladogenic transmission between  
5 *N. leucophthalma* and *N. flava*. Such extreme heterogeneity seems implausible, but more  
6 examples of cladogenic *Wolbachia* transmission are needed to definitively rule this out.

7

### 8 *Comparative genomics and cytoplasmic incompatibility*

9 Recent experiments strongly suggest that the *wMel* loci *WD0631* and *WD0632*, contained within  
10 the WO-B prophage, cause CI (Beckmann & Fallon 2013, LePage et al. 2017; Beckmann *et al.*  
11 2017). Despite having orthologs of both loci that are fairly similar to those in *wRi*, *D. suzukii* and  
12 *D. subpulchrella* show no apparent CI. There are two copies of these CI-associated loci in *wRi*,  
13 two in *wSpc*, and three in *wSuz*. As argued above, the additional copy in *wSuz* was acquired after  
14 *wSuz* and *wSpc* diverged. The differences we document in Table 6 between *wRi*, *wSuz* and *wSpc*  
15 at the CI-associated loci may be informative about the portions of those loci essential to CI.  
16 Unpublished data (L. Mouton, pers. comm.) show that *wRi* causes detectable, but slight, CI when  
17 introduced into *D. suzukii*. Given the high level of CI that *wRi* causes in *D. simulans*, these data  
18 suggest that *D. suzukii* may suppress CI, perhaps indicating a relatively old association with CI-  
19 causing *Wolbachia* (Turelli 1994; Hoffmann & Turelli 1997). We may be able to determine  
20 whether *D. suzukii* or *D. subpulchrella* was the donor of their closely related *Wolbachia* from  
21 population genomic analyses of their mtDNA and *Wolbachia*. Genomes from a geographically  
22 diverse sample of *D. suzukii* are currently being analyzed and may resolve the direction of  
23 *Wolbachia* transfer (J. C. Chiu, pers. comm.).

24 The published crossing studies in *D. suzukii* and *D. subpulchrella*, finding no statistically  
25 significant CI caused by *wSuz* or *wSpc*, are relatively small (Hamm *et al.* 2014; Cattel *et al.*

1 2016). They are comparable to the experiments that inferred no CI associated with the native  
2 *Wolbachia* infections in *D. yakuba*, *D. teissieri* and *D. santomea* (Charlat *et al.* 2004; Zabalou *et*  
3 *al.* 2004). However, larger experiments by Cooper *et al.* (2017) revealed consistent, albeit weak,  
4 CI in all three *yakuba* clade species and interspecific CI between these species. More replicated  
5 assays for CI in *D. sukuzii* and *D. subpulchrella*, as well as investigation of whether CI is  
6 produced when *wSpc* and *wSuz* are transinfected into CI-expressing hosts such as *D. simulans*,  
7 will indicate whether the differences described in Table 6 are candidates for disrupting the  
8 molecular processes underlying CI (Beckmann *et al.* 2017, LePage *et al.* 2017).

9

#### 10 *Conclusions and open questions*

11 Understanding how host species acquire *Wolbachia* requires comparing divergence-time  
12 estimates for closely related *Wolbachia* in sister species to divergence-time estimates for both  
13 their hosts' nuclear genes and mtDNA. To make confident inferences, we need better estimates  
14 of both the mean and variance of relative divergence rates for these three genomes. The variance  
15 for mtDNA divergence can be obtained from extant data, such as the many available *Drosophila*  
16 genomes. Estimates for nuclear, mitochondrial and *Wolbachia* genomes can be obtained from  
17 groups like the filarial nematodes for which co-divergence of the hosts and their obligate  
18 *Wolbachia* is well established (Bandi *et al.* 1998). Our ability to infer processes of *Wolbachia*  
19 acquisition will be greatly enhanced by additional examples of cladogenic transmission among  
20 insects, besides *Nasonia* wasps (Raychoudhury *et al.* 2008) and *Nomada* bees (Gerth & Bleidorn  
21 2016). For *D. sukuzii* and *D. subpulchrella*, distinguishing between introgression and horizontal  
22 transmission requires mtDNA sequences.

23 It is a challenge to understand the pattern of molecular evolution between closely related  
24 *Wolbachia* whereby all three nucleotide positions evolve at similar rates, producing comparable  
25 rates of synonymous versus non-synonymous substitutions. This is consistent with the pattern of

1 variation seen for *wMel* within *D. melanogaster* (Richardson et al. 2012). In contrast,  $k_s/k_a$   
2 increases to 2-3 for the cladogenically transmitted *Wolbachia* in *Nasonia* and *Nomada*; then  
3 increases to about 7 for the more distantly related *wAu* and *wRi* infecting *D. simulans*. Does  
4 *Wolbachia* “invasion” of a new host represent a relaxation of selective constraint or an  
5 opportunity for adaptation?  
6

## 1   **References**

- 2
- 3   Baldo L, Hotopp JCD, Jolley KA *et al.* (2006). Multilocus sequence typing system for the  
4        endosymbiont *Wolbachia pipientis*. *Applied Environmental Microbiology*, **72**, 7098–7110.
- 5   Bandi C, Anderson TJC, Genchi C, Blaxter ML (1998) Phylogeny of *Wolbachia* in filarial  
6        nematodes. *Proceedings of the Royal Society of London B*, **265**, 2407–2413.
- 7   Beckmann JF, Fallon AM (2013) Detection of the *Wolbachia* protein WPIP0282 in mosquito  
8        spermathecae: Implications for cytoplasmic incompatibility. *Insect Biochemistry and*  
9        *Molecular Biology*, **43**, 867–878.
- 10   Beckmann JF, Ronau JA, Hochstrasser (2017) A *Wolbachia* deubiquitylating enzyme induces  
11        cytoplasmic incompatibility. *Nature Microbiology*, **2**, 17007.
- 12   Boeva V, Popova T, Bleakley K *et al.* (2012) Control-FREEC: a tool for assessing copy number  
13        and allelic content using next-generation sequencing data. *Bioinformatics*, **28**, 423–425.
- 14   Brownlie JC, Cass BN, Riegler M *et al.* (2009) Evidence for metabolic provisioning by a  
15        common invertebrate endosymbiont, *Wolbachia pipientis*, during periods of nutritional  
16        stress. *PLoS Pathogens*, **5**, e1000368.
- 17   Cattell J, Kaur R, Gilbert P *et al.* (2016) *Wolbachia* in European populations of the invasive pest  
18        *Drosophila suzukii*: regional variation in infection frequencies. *PLoS ONE*, **11**, e0147766.
- 19   Catullo RA, Oakeshott JG (2014) Problems with data quality in the reconstruction of  
20        evolutionary relationships in the *Drosophila melanogaster* species group: Comments on  
21        Yang *et al.* (2012). *Molecular Phylogenetics and Evolution*, **78**, 275–276.
- 22   Charlat S, Ballard JWO, Mercot H (2004) What maintains noncytoplasmic incompatibility  
23        inducing *Wolbachia* in their hosts: a case study from a natural *Drosophila yakuba*  
24        population. *Journal of Evolutionary Biology*, **17**, 322–330.
- 25   Chen ZX, Sturgill D, Qu J *et al.* (2014). Comparative validation of the *D. melanogaster*  
26        modENCODE transcriptome annotation. *Genome Research*, **24**, 1209–1223.
- 27   Chrostek E, Teixeira L (2015) Mutualism breakdown by amplification of *Wolbachia* genes.  
28        *PLoS Biology*, **13**, e1002065.
- 29   Cini A, Ioriatti C, Anfora G (2012) A review of the invasion of *Drosophila suzukii* in Europe and  
30        a draft research agenda for Integrated Pest Management. *Bulletin of Insectology*, **65**, 149–  
31        160.
- 32   Cooper BS, Ginsberg PS, Turelli M, Matute DR (2017) *Wolbachia* in the *Drosophila yakuba*  
33        complex: pervasive frequency variation and weak cytoplasmic incompatibility, but no  
34        apparent effect on reproductive isolation. *Genetics*, **205**, 333–351.
- 35   Coyne JA, Orr HA (1989) Patterns of speciation in *Drosophila*. *Evolution*, **43**, 362–381.
- 36   Coyne JA, Orr HA (1997) “Patterns of speciation in *Drosophila*” revisited. *Evolution*, **51**, 295–  
37        303.
- 38   Coyne JA, Orr HA (2004) *Speciation*. Sinauer Associates, Sunderland, MA.
- 39   Ellegaard KM, Klasson L, Naslund K, *et al.* (2013) Comparative genomics of *Wolbachia* and the  
40        bacterial species concept. *PLoS Genetics*, **9**, e1003381.
- 41   Gerth M, Bleidorn C (2016) Comparative genomics provides a timeframe for *Wolbachia*  
42        evolution and exposes a recent biotin synthesis operon transfer. *Nature Microbiology*, **2**,  
43        16241.

- 1 Gillespie JH, Langley CH (1979) Are evolutionary rates really variable? *Journal of Molecular*  
2 *Evolution*, **13**, 27–34.
- 3 Hamm CA, Begun DJ, Vo A *et al.* (2014) *Wolbachia* do not live by reproductive manipulation  
4 alone: infection polymorphism in *Drosophila suzukii* and *D. subpulchrella*. *Molecular*  
5 *Ecology*, **23**, 4871–4885.
- 6 Hauser M (2011) A historic account of the invasion of *Drosophila suzukii* (Matsumura) (Diptera:  
7 Drosophilidae) in the continental United States, with remarks on their identification. *Pest*  
8 *Management Science*, **67**, 1352–1357.
- 9 Hoffmann AA, Turelli M (1997) Cytoplasmic incompatibility in insects. In: O'Neill SL,  
10 Hoffmann AA, Werren JH (eds) *Influential Passengers: Inherited microorganisms and*  
11 *arthropod reproduction*, Oxford University Press: New York, NY, pp 42–80.
- 12 Hotopp JCD, Clark ME, Oliveira DCSG, *et al.* (2007) Widespread lateral gene transfer from  
13 intracellular bacteria to multicellular eukaryotes. *Science*, **317**, 1753–1756.
- 14 Hu TT, Eisen MB, Thornton KR, Andolfatto P (2013) A second-generation assembly of the  
15 *Drosophila simulans* genome provides new insights into patterns of lineage-specific  
16 divergence. *Genome Research*, **23**, 89–98.
- 17 Hurst GD, Jiggins FM (2000) Male-killing bacteria in insects: mechanisms, incidence, and  
18 implications. *Emerging Infectious Diseases*, **6**, 329–336.
- 19 Iturbe-Ormaetxe I, Woolfit M, Rances E *et al.* (2010) A simple protocol to obtain highly pure  
20 *Wolbachia* endosymbiont DNA for genome sequencing. *Journal of Microbiological*  
21 *Methods*, **84**, 134–136.
- 22 Katoh S (2013) MAFFT multiple sequence alignment software version 7: improvements in  
23 performance and usability. *Molecular Biology and Evolution*, **30**, 772–780.
- 24 Klasson L, Westberg J, Sapountzis P *et al.* (2009) The mosaic genome structure of the  
25 *Wolbachia wRi* strain infecting *Drosophila simulans*. *Proceedings of the National Academy*  
26 *of Sciences USA*, **106**, 5725–5730.
- 27 Kriesner P, Conner WR, Weeks AR, *et al.* (2016) Persistence of a *Wolbachia* infection frequency  
28 cline in *Drosophila melanogaster* and the possible role of reproductive dormancy. *Evolution*,  
29 **70**, 979–997.
- 30 Kriesner P, Hoffmann AA, Lee SF *et al.* (2013) Rapid sequential spread of two *Wolbachia*  
31 variants in *Drosophila simulans*. *PLoS Pathogens*, **9**, e1003607.
- 32 Lachaise D, Harry M, Solignac M *et al.* (2000) Evolutionary novelties in islands: *Drosophila*  
33 *santomea*, a new *melanogaster* sister species from São Tomé. *Proceedings of the Royal*  
34 *Society of London B*, **267**, 1487–1495.
- 35 Langley CH, Fitch WM (1974) An examination of the constancy of the rate of molecular  
36 evolution. *Journal of Molecular Evolution*, **3**, 161–177.
- 37 LePage DP, Metcalf JA, Bordenstein SR *et al.* (2017) Prophage WO genes recapitulate and  
38 enhance *Wolbachia*-induced cytoplasmic incompatibility. *Nature*, **543**, 243–247.
- 39 Li H, Durbin R (2009) Fast and accurate short read alignment with Burrows-Wheeler transform.  
40 *Bioinformatics*, **25**, 1754–1760.
- 41 Luo R, Bianghang L, Yinlong X *et al.* (2012) SOAPdenovo2: an empirically improved memory-  
42 efficient short-read *de novo* assembler. *GigaScience*, **1**, 18.



- 1 Mazzetto F, Gonella E, Alma A (2015) *Wolbachia* infection affects female fecundity in  
2 *Drosophila suzukii*. *Bulletin of Insectology*, **68**, 153-157.
- 3 Min K-T, Benzer S 1997 *Wolbachia*, normally a symbiont of *Drosophila*, can be virulent,  
4 causing degeneration and early death. *Proceedings of the National Academy of Sciences*, **94**,  
5 10792–10796.
- 6 Obbard DJ, Maclennan J, Kim KW *et al.* (2012) Estimating divergence dates and substitution  
7 rates in the *Drosophila* phylogeny. *Molecular Biology and Evolution*, **29**, 3459–3473.
- 8 Ometto L, Cestaro A, Ramasamy S *et al.* (2013) Linking genomics and ecology to investigate the  
9 complex evolution of an invasive *Drosophila* pest. *Genome Biology Evolution*, **5**:745–757.
- 10 O’Neill SL, Giordano R, Colbert AM *et al.* (1992) 16S rRNA phylogenetic analysis of the  
11 bacterial endosymbionts associated with cytoplasmic incompatibility in insects. *Proceedings*  
12 *of the National Academy of Sciences*, **89**, 2699–2702.
- 13 Rambaut A, Drummond AJ (2014) Tracer v1.6. Available at <http://beast.bio.ed.ac.uk/Tracer>.
- 14 Richardson MF, Weinert LA, Welch JJ *et al.* (2012) Population genomics of the *Wolbachia*  
15 endosymbiont in *Drosophila melanogaster*. *PLoS Genetics*, **8**, e1003129.
- 16 Ronquist F, Huelsenbeck JP (2003) MRBAYES 3: Bayesian phylogenetic inference under mixed  
17 models. *Bioinformatics*, **19**, 1572–1574.
- 18 Rota-Stabelli O, Blaxter M, Anfora G (2013) Quick Guide: *Drosophila suzukii*. *Current Biology*,  
19 **23**, R8-R9.
- 20 Rousset F, Solignac M (1995) Evolution of single and double *Wolbachia* symbioses during  
21 speciation in the *Drosophila simulans* complex. *Proceedings of the National Academy of*  
22 *Sciences*, **92**, 6389–6393.
- 23 Rousset F, Bouchon D, Pintureau B *et al.* (1992) *Wolbachia* endosymbionts responsible for  
24 various alterations of sexuality in arthropods. *Proceedings of the Royal Society of London B*,  
25 **250**, 91–98.
- 26 Rozas J (2009). DNA sequence polymorphism analysis using DnaSP. Pp. 337-350. In Posada D  
27 (ed) *Bioinformatics for DNA Sequence Analysis*; Methods in Molecular Biology Series, Vol.  
28 537. Humana Press, NJ, USA.
- 29 Raychoudhury R, Baldo L, Oliveira DC, Werren JH (2008) Modes of acquisition of *Wolbachia*:  
30 horizontal transfer, hybrid introgression, and codivergence in the *Nasonia* species complex.  
31 *Evolution*, **63**, 165–183.
- 32 Seemann T (2014) Prokka: Rapid Prokaryotic Genome Annotation. *Bioinformatics*, **30**, 2068–  
33 2069.
- 34 Siozos S, Cestaro A, Kaur R *et al.* (2013) Draft genome sequence of the *Wolbachia*  
35 endosymbiont of *Drosophila suzukii*. *Genome Announcements*, **1**, e00032-13
- 36 Stouthamer R, Breeuwer JA, Luck RF *et al.* (1993) Molecular identification of microorganisms  
37 associated with parthenogenesis. *Nature*, **361**, 66–68.
- 38 Sutton ER, Harris SR, Parkhill J, Sinkins SP (2014) Comparative genome analysis of *Wolbachia*  
39 strain wAu. *BMC Genomics*, **15**, 928.
- 40 Takamori H, Watabe H, Fuyama Y *et al.* (2006) *Drosophila subpulchrella*, a new species of the  
41 *Drosophila suzukii* species subgroup from Japan and China (Diptera: Drosophilidae)  
42 *Entomological Science*, **9**, 121–128.
- 43 Teixeira L, Ferreira Á, Ashburner M (2008) The bacterial symbiont *Wolbachia* induces  
44 resistance to RNA viral infections in *Drosophila melanogaster*. *PLoS Biology*, **6**, e2.

- 1 Turelli M (1994) Evolution of incompatibility-inducing microbes and their hosts.  
2 *Evolution*, **48**, 1500–1513.
- 3 Turelli M, Hoffmann AA (1995) Cytoplasmic incompatibility in *Drosophila simulans*: dynamics  
4 and parameter estimates from natural populations. *Genetics*, **140**, 1319–1338.
- 5 Turelli M, Lipkowitz JR, Brandvain Y (2014) On the Coyne and Orr-igin of species: effects of  
6 intrinsic postzygotic isolation, ecological differentiation, X-chromosome size, and sympatry  
7 on *Drosophila* speciation. *Evolution*, **68**, 1176–1187.
- 8 Weeks AR, Turelli M, Harcombe WR, *et al.* (2007) From parasite to mutualist: rapid evolution  
9 of *Wolbachia* in natural populations of *Drosophila*. *PLoS Biology*, **5**, 997–1005.
- 10 Weinert LA, Araujo-Jnr EV, Ahmed MZ *et al.* (2015) The incidence of bacterial endosymbionts  
11 in terrestrial arthropods. *Proceedings of the Royal Society of London B*, **282**, 20150249.
- 12 Wu ML, Sun VL, Vamathevan L *et al.* (2004) Phylogenomics of the reproductive parasite  
13 *Wolbachia pipientis* wMel: A streamlined genome overrun with mobile genetic elements.  
14 *PLoS Biology*, **2**, 327–341.
- 15 Yang Y, Hou ZH, Qian YH *et al.* (2012) Increasing the data size to accurately reconstruct the  
16 phylogenetic relationships between nine subgroups of the *Drosophila melanogaster* species  
17 group (Drosophilidae, Diptera). *Molecular Phylogenetics and Evolution*, **62**, 214–223.
- 18 Zabalou S, Charlat S, A. Nirgianaki A *et al.* (2004) Natural *Wolbachia* infections in the  
19 *Drosophila yakuba* species complex do not induce cytoplasmic incompatibility but fully  
20 rescue the wRi modification. *Genetics*, **167**, 827–834.

21

## 22 **Author Contributions**

23 The genomic data for *D. subpulchrella* and wSpc were generated by O. R.-S., L. O., M. B. and G.  
24 A. The bioinformatic analyses were performed by W. R. C. with input from M. T., M. B. and O.  
25 R.-S. The first draft of the manuscript was produced by M. T. , W. R. C. and M. B. with  
26 subsequent improvements by all authors.

27

## 28 **Data Accessibility**

29 The assembly of wSpc will be made available on Genbank once the manuscript is accepted for  
30 publication.

31

32



## 1 **Supporting information**

2 Additional information may be found in the online version of this article.

3 **Table S1.** Observed pairwise genomic differences between *Wolbachia* strains, given as  
4 percentage of polymorphic sites in single-copy, full-length genes present in all three strains.

5

6 **Table S2** Matrix of  $k_a$  (below diagonal) and  $k_s$  (above diagonal) estimates for  $wSuz$ ,  $wSpc$ ,  $wRi$ ,  
7  $wAu$  and  $wMel$  (using the 429,765 bp data set from Table S1).

8

9 **Table S3** The 28 substitutions differentiating  $wSpc$  and  $wSuz$ .

10

11 **Table S4** Genes present in CNV regions of  $wSuz$  or  $wSpc$  relative to  $wRi$ . All locations are  
12 relative to the  $wRi$  reference sequence of Klasson *et al.* (2009).

13

## 14 **Figure Legends**

15 **Fig. 1** Phylogram and chronograms for the *Wolbachia* and hosts discussed. Clade posterior  
16 probabilities are shown. A) *Wolbachia* phylogram. B) *Wolbachia* chronogram with an  
17 estimate of the divergence time for  $wSuz$  and  $wSpc$ . Branch lengths relative to the  $wSpc$ -  
18  $wSuz$  divergence are shown. All clade posterior probabilities are 1.0. C) Host chronogram  
19 with an estimate of divergence time for *D. sukuzii* and *D. subpulchrella*. Branch lengths  
20 relative to the *D. sukuzii*-*D. subpulchrella* divergence are shown. All clade posterior  
21 probabilities are 1.0.

22

23 **Fig. 2** We compare normalized read-density relative to the  $wRi$  reference sequence of Klasson *et*  
24 *al.* (2009) for: A) the Illumina reads from Riv84 version of  $wRi$  were reported by Iturbe-  
25 Ormaetxe *et al.* (2010), B) the  $wSuz$  reads are from Ometto *et al.* (2014), and C) the  $wSpc$   
26 reads are from this study.

27

**Table 1** Estimated number of substitutions per site by codon position between  $w_{Suz}$  and  $w_{Spc}$ , plus estimates of synonymous ( $k_s$ ) and non-synonymous ( $k_a$ ) substitution rates, see the text for details.

| Position               | Point Estimates                        | 95% Confidence Interval                    |
|------------------------|----------------------------------------|--------------------------------------------|
| 1 <sup>st</sup>        | $5.0 \times 10^{-5}$                   | $(3.0 \times 10^{-5}, 7.0 \times 10^{-5})$ |
| 2 <sup>nd</sup>        | $3.2 \times 10^{-5}$                   | $(1.6 \times 10^{-5}, 4.6 \times 10^{-5})$ |
| 3 <sup>rd</sup>        | $4.0 \times 10^{-5}$                   | $(2.4 \times 10^{-5}, 5.6 \times 10^{-5})$ |
| Overall ( $k_s, k_a$ ) | $(3 \times 10^{-5}, 4 \times 10^{-5})$ |                                            |

1  
2  
3  
4  
5

**Table 2** Estimated number of substitutions per site by codon position between *D. sukuzii* and *D. subpulchrella* for nuclear coding regions, plus estimates of synonymous ( $k_s$ ) and non-synonymous ( $k_a$ ) substitution rates, see the text for details.

| Position               | Point Estimates                            | 95% Confidence Interval                      |
|------------------------|--------------------------------------------|----------------------------------------------|
| 1 <sup>st</sup>        | $1.20 \times 10^{-2}$                      | $(1.03 \times 10^{-2}, 1.36 \times 10^{-2})$ |
| 2 <sup>nd</sup>        | $5.65 \times 10^{-3}$                      | $(4.68 \times 10^{-3}, 6.48 \times 10^{-3})$ |
| 3 <sup>rd</sup>        | $9.19 \times 10^{-2}$                      | $(8.41 \times 10^{-2}, 1.00 \times 10^{-1})$ |
| Overall ( $k_s, k_a$ ) | $(1.2 \times 10^{-1}, 5.3 \times 10^{-3})$ |                                              |

1  
2

1

**Table 3** Estimated frequencies of synonymous ( $k_s$ ) versus non-synonymous ( $k_a$ ) substitutions per site for *Wolbachia* in various hosts.

| Data source         | Species 1                 | Species 2                       | Host                  |                      | <i>Wolbachia</i>     |                      | $k_s$ ratio |
|---------------------|---------------------------|---------------------------------|-----------------------|----------------------|----------------------|----------------------|-------------|
|                     |                           |                                 | $k_s$                 | $k_a$                | $k_s$                | $k_a$                |             |
| this work           | <i>Drosophila suzukii</i> | <i>Drosophila subpulchrella</i> | $1.2 \times 10^{-1}$  | $5.3 \times 10^{-3}$ | $3 \times 10^{-5}$   | $4 \times 10^{-5}$   | 0.00025     |
| Raychoudhury et al. | <i>Nasonia giraulti</i>   | <i>Nasonia longicornis</i>      | $1.22 \times 10^{-2}$ | $5.4 \times 10^{-3}$ | $3.7 \times 10^{-3}$ | $2.2 \times 10^{-3}$ | 0.30        |
| Gerth & Bleidorn    | <i>Nomada ferruginata</i> | <i>Nomada leucophthalma</i>     | $1.95 \times 10^{-2}$ | $2.6 \times 10^{-3}$ | $2.5 \times 10^{-3}$ | $9 \times 10^{-4}$   | 0.13        |
| ibid.               | <i>N. ferrug.</i>         | <i>N. flava</i>                 | $1.92 \times 10^{-2}$ | $2.7 \times 10^{-3}$ | $2.5 \times 10^{-3}$ | $9 \times 10^{-4}$   | 0.13        |
| ibid.               | <i>N. ferrug.</i>         | <i>N. panzeri</i>               | $1.84 \times 10^{-2}$ | $3.1 \times 10^{-3}$ | $2.7 \times 10^{-3}$ | $1.1 \times 10^{-3}$ | 0.15        |
| ibid.               | <i>N. leuco.</i>          | <i>N. flava</i>                 | $6.8 \times 10^{-3}$  | $4 \times 10^{-4}$   | $1 \times 10^{-4}$   | $1 \times 10^{-4}$   | 0.015       |
| ibid.               | <i>N. leuco.</i>          | <i>N. panzeri</i>               | $5.8 \times 10^{-3}$  | $8 \times 10^{-4}$   | $3 \times 10^{-4}$   | $2 \times 10^{-4}$   | 0.052       |
| ibid.               | <i>N. flava</i>           | <i>N. panzeri</i>               | $5.5 \times 10^{-3}$  | $9 \times 10^{-4}$   | $3 \times 10^{-4}$   | $3 \times 10^{-4}$   | 0.055       |

2

3

1

**Table 4** Copy-number variants in *wSuz* and *wSpc* relative to *wRi*. All positions are given relative to the *wRi* reference of Klasson *et al.* (2009).

| Start position | End position | Copy number change | Kolmogorov-Smirnov <i>P</i> -value | Affected genomes          |
|----------------|--------------|--------------------|------------------------------------|---------------------------|
| 570000         | 592500       | 2 → 3*             | <0.0001                            | <i>wSuz</i>               |
| 733000         | 756000       | 1 → 0              | <0.0001                            | <i>wSuz</i> , <i>wSpc</i> |
| 1077500        | 1100000      | 2 → 3*             | <0.0001                            | <i>wSuz</i>               |
| 1345000        | 1347500      | 1 → 2              | 0.016                              | <i>wSuz</i>               |

2 \*This sequence is duplicated in the *wRi* genome, so it was treated as diploid in our

3 ControlFREEC 8.0 analysis.

4

5

1 **Table 5** Homologs of CI-associated loci in *wMel*, *wRi*, *wSuz* and *wSpc*. The gene designations  
 2 in *wSpc* and *wSuz* reflect homology to loci identified in *wMel* and *wRi*.

| <i>Wolbachia</i> | gene pair <sup>*</sup> | Gene 1                                                | Gene 2                                             | WO prophage association <sup>†</sup> |
|------------------|------------------------|-------------------------------------------------------|----------------------------------------------------|--------------------------------------|
| <i>wMel</i>      | I                      | <i>WD0631 (cifA/cidA)</i> <sup>‡</sup><br>(antidote?) | <i>WD0632 (cifB/cidB)</i> <sup>‡</sup><br>(toxin?) | yes                                  |
| <i>wRi</i>       | I.1                    | <i>wRi_005370</i>                                     | <i>wRi-p005380</i> <sup>§</sup>                    | yes                                  |
|                  | I.2                    | <i>wRi_010030</i>                                     | <i>wRi_p010040</i> <sup>§</sup>                    | yes                                  |
|                  | II                     | <i>wRi_006720</i>                                     | <i>wRi_006710</i>                                  | no                                   |
| <i>wSpc</i>      | I.1                    | <i>wSpc_0631.I.1</i>                                  | <i>wSpc_0632.I.1</i>                               | yes                                  |
|                  | I.2                    | <i>wSpc_0631.I.2</i>                                  | <i>wSpc_0632.II.2</i>                              | yes                                  |
|                  | II                     | <i>wSpc_6720</i> (disrupted)                          | <i>wSpc_6710</i>                                   | no                                   |
| <i>wSuz</i>      | I.1                    | <i>wSuz_0631.I.1</i>                                  | <i>wSuz_0632.I.1</i>                               | yes                                  |
|                  | I.2                    | <i>wSuz_0631.I.2</i>                                  | <i>wSuz_0632.II.2</i>                              | yes                                  |
|                  | I.3                    | <i>wSuz_0631.I.3</i>                                  | <i>wSuz_0632.II.3</i>                              | partial <sup>¶</sup>                 |
|                  | II                     | <i>wSuz_6720</i> (disrupted)                          | <i>wSuz_6710</i>                                   | no                                   |

3 <sup>\*</sup>Roman numerals follow the “type” designations in LePage *et al.* (2017).

4 <sup>†</sup>This refers to location within an intact WO prophage, as opposed to a “WO-like island” (*cf.*  
 5 LePage *et al.* 2017).

6 <sup>‡</sup>Alternative designations (*cif* versus *cin*) from LePage *et al.* (2017) and Beckmann *et al.* (2017),  
 7 respectively. Beckmann *et al.* (2017) proposes that *WD0631* produces an antidote to the toxin  
 8 produced by *WD0632*.

9 <sup>§</sup>Annotated as pseudogenes, but see text.

10 <sup>¶</sup>This third copy in *wSuz* exists in the 1077500-1100000 CNV, noted in Table 4, which is a  
 11 partial copy of the WO-B prophage.

12

1

**Table 6** Comparisons between *wRi*, *wSpc* and *wSuz* at the CI-associated (type I, possible antidote, toxin) loci, *WD0631* and *WD0632*, from *wMel*, and the paralogous loci (type II), *WRi\_006710* and *WRi\_006720* from *wRi*. All reads from *wSpc* and *wSuz* are consistent with the differences shown.

| Location (gene, amino acid)                  | <i>wRi</i> codon<br>(codon, translation) | <i>wSpc</i> codon<br>(codon, translation) | <i>wSuz</i> codon<br>(codon, translation) |
|----------------------------------------------|------------------------------------------|-------------------------------------------|-------------------------------------------|
| <b><i>WD0631</i><sup>*</sup> (antidote?)</b> |                                          |                                           |                                           |
| 363                                          | AAA, Lys                                 | GAA, Glu                                  | GAA, Glu                                  |
| 473                                          | AAA, Lys                                 | AGA, Arg                                  | AGA, Arg                                  |
| <b><i>WD0632</i><sup>†</sup> (toxin?)</b>    |                                          |                                           |                                           |
| 91                                           | GGA, Gly                                 | GGG, Gly                                  | GGG, Gly                                  |
| 176                                          | TAT, Tyr                                 | GAT, Asp                                  | GAT, Asp                                  |
| 213                                          | TAT, Tyr                                 | TAC, Tyr                                  | TAC, Tyr                                  |
| 1118                                         | TTA, Leu                                 | TGA, STOP                                 | TTA, Leu                                  |
| <b><i>WRi_006710</i></b>                     |                                          |                                           |                                           |
| 663                                          | TAT, Tyr                                 | CAT, His                                  | CAT, His                                  |
| <b><i>WRi_006720</i></b>                     |                                          |                                           |                                           |
| 1 to 108                                     | Present                                  | Disrupted, see text                       | Disrupted, see text                       |

2 <sup>\*</sup>The duplicate orthologs in *wRi* are *WRi\_005370* and *WRi\_010030*.

3 <sup>†</sup>The duplicate orthologs in *wRi* are *WRi\_p005380* and *WRi\_p010040*.

4

5

1

**Table S1** Observed pairwise genomic differences between *Wolbachia* strains, given as percentage of polymorphic sites in single-copy, full-length genes present in all three strains.

| wSpc-wSuz-wRi dataset (704,883 base pairs, 703 genes)          |                       |                    |
|----------------------------------------------------------------|-----------------------|--------------------|
| Genomes                                                        | Number of differences | Percent difference |
| wSpc v. wSuz                                                   | 28                    | 0.004%             |
| wRi v. wSuz                                                    | 103                   | 0.014%             |
| wRi v. wSpc                                                    | 99                    | 0.015%             |
| wSpc-wSuz-wRi-wMel-wAu dataset (480,831 base pairs, 512 genes) |                       |                    |
| Genomes                                                        | Number of differences | Percent difference |
| wSpc v. wSuz                                                   | 21                    | 0.005%             |
| wSuz v. wRi                                                    | 62                    | 0.014%             |
| wSpc v. wRi                                                    | 59                    | 0.014%             |

2

**Table S2** Matrix of  $k_a$  (below diagonal) and  $k_s$  (above diagonal) estimates for wSuz, wSpc, wRi, wAu and wMel (using the 429,765 bp data set from Table S1).

|      | wSuz   | wSpc   | wRi    | wAu   | wMel  |
|------|--------|--------|--------|-------|-------|
| wSuz |        | 0.002% | 0.017% | 4.58% | 4.58% |
| wSpc | 0.005% |        | 0.019% | 4.57% | 4.58% |
| wRi  | 0.013% | 0.014% |        | 4.57% | 4.58% |
| wAu  | 0.78%  | 0.77%  | 0.77%  |       | 0.20% |
| wMel | 0.78%  | 0.78%  | 0.78%  | 0.10% |       |

3

4



**Table S3** The 28 substitutions differentiating *wSpc* and *wSuz*.

| <b>Gene</b>       | <b>Amino Acid</b> | <b><i>wSpc</i><br/>codon</b> | <b><i>wSuz</i><br/>codon</b> | <b>Gene Description</b>                                                 |
|-------------------|-------------------|------------------------------|------------------------------|-------------------------------------------------------------------------|
| <i>WRi_000230</i> | 228               | GTT(Val)                     | ATT(Ile)                     | DNA-directed RNA polymerase beta subunit                                |
| <i>WRi_000410</i> | 67                | GCT(Ala)                     | GCC(Ala)                     | hypothetical protein                                                    |
| <i>WRi_000410</i> | 118               | TCG(Ser)                     | TTG(Leu)                     | hypothetical protein                                                    |
| <i>WRi_000780</i> | 310               | TGC(Cys)                     | TGT(Cys)                     | GTP/ATP binding protein putative                                        |
| <i>WRi_001670</i> | 103               | GAC(Asp)                     | GAT(Asp)                     | enoyl-(acyl-carrier-protein) reductase                                  |
| <i>WRi_002520</i> | 228               | GAT(Asp)                     | CAT(His)                     | GTP-binding protein                                                     |
| <i>WRi_002650</i> | 6                 | GAA(Glu)                     | AAA(Lys)                     | hypothetical protein                                                    |
| <i>WRi_003080</i> | 374               | ACA(Thr)                     | ACG(Thr)                     | succinate dehydrogenase flavoprotein subunit                            |
| <i>WRi_003240</i> | 59                | TCT(Ser)                     | CCT(Pro)                     | hypothetical protein                                                    |
| <i>WRi_003580</i> | 722               | TTA(Leu)                     | CTA(Leu)                     | hypothetical protein                                                    |
| <i>WRi_004080</i> | 303               | CGG(Arg)                     | TGG(Trp)                     | bicyclomycin resistance protein                                         |
| <i>WRi_004790</i> | 793               | CCT(Pro)                     | TCT(Ser)                     | hypothetical protein                                                    |
| <i>WRi_004810</i> | 31                | AAT(Asn)                     | ACT(Thr)                     | protoheme IX farnesyltransferase                                        |
| <i>WRi_006490</i> | 372               | AAC(Asn)                     | GAC(Asp)                     | deoxyguanosinetriphosphate triphosphohydrolase                          |
| <i>WRi_006610</i> | 26                | CAA(Gly)                     | CCA(Pro)                     | polysaccharide deacetylase putative                                     |
| <i>WRi_007380</i> | 335               | AAT(Asn)                     | AGT(Ser)                     | peptidase M16 family                                                    |
| <i>WRi_007510</i> | 47                | GGG(Gly)                     | GCG(Ala)                     | hypothetical protein                                                    |
| <i>WRi_008460</i> | 296               | TAT(Tyr)                     | CAT(His)                     | iron compound ABC transporter periplasmic iron compound-binding protein |
| <i>WRi_008830</i> | 45                | ACT(Thr)                     | GCT(Ala)                     | hypothetical protein                                                    |
| <i>WRi_008830</i> | 29                | GCA(Ala)                     | GTA(Val)                     | hypothetical protein                                                    |
| <i>WRi_010700</i> | 179               | ATT(Ile)                     | ATG(Met)                     | permease putative                                                       |
| <i>WRi_010800</i> | 415               | TTG(Leu)                     | TTT(Phe)                     | sodium/alanine symporter family protein                                 |
| <i>WRi_010800</i> | 226               | ATG(Met)                     | ATT(Ile)                     | sodium/alanine symporter family protein                                 |
| <i>WRi_011150</i> | 29                | GAA(Glu)                     | GCA(Ala)                     | putative monovalent cation/H <sup>+</sup> antiporter subunit D          |
| <i>WRi_011880</i> | 231               | GAT(Asp)                     | AAT(Asn)                     | Succinyl-CoA synthetase beta subunit                                    |
| <i>WRi_012790</i> | 260               | GGG(Gly)                     | GAG(Glu)                     | Type IV secretion system protein VirB9 putative                         |
| <i>WRi_012830</i> | 128               | ATT(Ile)                     | ATG(Met)                     | rod shape-determining protein RodA                                      |
| <i>WRi_012980</i> | 22                | TGT(Cys)                     | TTT(Phe)                     | HIT family protein                                                      |

1  
2

1

**Table S4** Genes present in CNV regions of *wSuz* or *wSpc* relative to *wRi*. All locations are relative to the *wRi* reference sequence of Klasson *et al.* (2009).

| CNV LOCATION                      | COPY NUMBER CHANGE | AFFECTED GENOMES   | KOLMOGOROV-SMIRNOV P-VALUE                                                                            |
|-----------------------------------|--------------------|--------------------|-------------------------------------------------------------------------------------------------------|
| 570000-592500,<br>1077500-1100000 | 2 → 3              | <i>wSuz</i> only   | <0.0001                                                                                               |
| GENE START                        | GENE END           | GENE ID            | GENE DESCRIPTION                                                                                      |
| 571723                            | 573147             | <i>WRi_005370</i>  | Hypothetical protein: ortholog to <i>WD0631</i> , one of the tandem putative CI loci in <i>wMel</i> . |
| 573202                            | 576723             | <i>WRi_p005380</i> | Putative pseudogene, a truncated ortholog of <i>WD0632</i> (and <i>wPip_0283</i> )                    |
| 577843                            | 580743             | <i>WRi_005390</i>  | Ankyrin repeat domain protein                                                                         |
| 581150                            | 582643             | <i>WRi_005400</i>  | site-specific recombinase resolvase family                                                            |
| 582831                            | 583663             | <i>WRi_005420</i>  | transposase                                                                                           |
| 584009                            | 584467             | <i>WRi_005440</i>  | ankyrin repeat domain protein                                                                         |
| 584493                            | 585227             | <i>WRi_005450</i>  | ankyrin repeat domain protein                                                                         |
| 585395                            | 586555             | <i>WRi_005460</i>  | hypothetical protein                                                                                  |
| 586555                            | 587346             | <i>WRi_005470</i>  | baseplate assembly protein J putative                                                                 |
| 587349                            | 587684             | <i>WRi_005480</i>  | baseplate assembly protein W putative                                                                 |
| 587687                            | 587941             | <i>WRi_005490</i>  | hypothetical protein                                                                                  |
| 587949                            | 588413             | <i>WRi_005500</i>  | baseplate assembly protein V                                                                          |
| 588400                            | 588876             | <i>WRi_005510</i>  | hypothetical protein                                                                                  |
| 588873                            | 589394             | <i>WRi_005520</i>  | minor tail protein Z putative                                                                         |
| 589396                            | 589701             | <i>WRi_005530</i>  | hypothetical protein                                                                                  |
| 589799                            | 590803             | <i>WRi_005540</i>  | hypothetical protein                                                                                  |
| 590841                            | 591212             | <i>WRi_005550</i>  | hypothetical protein                                                                                  |
| 591287                            | 592348             | <i>WRi_005560</i>  | minor capsid protein C putative                                                                       |
| 1078182                           | 1079606            | <i>WRi_010030</i>  | Hypothetical protein: ortholog to <i>WD0631</i> , one of the tandem putative CI loci in <i>wMel</i> . |
| 1079661                           | 1083182            | <i>WRi_p010040</i> | Putative pseudogene, a truncated ortholog of <i>WD0632</i> (and <i>wPip_0283</i> )                    |
| 1084302                           | 1087202            | <i>WRi_010050</i>  | Ankyrin repeat domain protein                                                                         |
| 1087609                           | 1089102            | <i>WRi_010060</i>  | site-specific recombinase resolvase family                                                            |
| 1089290                           | 1090122            | <i>WRi_010080</i>  | transposase                                                                                           |
| 1090468                           | 1090926            | <i>WRi_010100</i>  | ankyrin repeat domain protein                                                                         |
| 1090952                           | 1091686            | <i>WRi_010110</i>  | ankyrin repeat domain protein                                                                         |
| 1091854                           | 1093014            | <i>WRi_010120</i>  | hypothetical protein                                                                                  |
| 1093014                           | 1093805            | <i>WRi_010130</i>  | baseplate assembly protein J putative                                                                 |
| 1093808                           | 1094143            | <i>WRi_010140</i>  | baseplate assembly protein W putative                                                                 |
| 1094146                           | 1094400            | <i>WRi_010150</i>  | hypothetical protein                                                                                  |
| 1094408                           | 1094872            | <i>WRi_010160</i>  | baseplate assembly protein V                                                                          |

|                     |                           |                         |                                   |
|---------------------|---------------------------|-------------------------|-----------------------------------|
| 1094859             | 1095335                   | <i>WRi_010170</i>       | hypothetical protein              |
| 1095332             | 1095853                   | <i>WRi_010180</i>       | minor tail protein Z putative     |
| 1095855             | 1096160                   | <i>WRi_010190</i>       | hypothetical protein              |
| 1096258             | 1097262                   | <i>WRi_010200</i>       | hypothetical protein              |
| 1097300             | 1097671                   | <i>WRi_010210</i>       | hypothetical protein              |
| 1097746             | 1098807                   | <i>WRi_010220</i>       | minor capsid protein C putative   |
| <b>CNV LOCATION</b> | <b>COPY NUMBER CHANGE</b> | <b>AFFECTED GENOMES</b> | <b>KOLMOGOROV-SMIRNOV P-VALUE</b> |
| 733000-756000       | 1 → 0                     | wSuz and wSpc           | <0.0001                           |
| <b>GENE START</b>   | <b>GENE END</b>           | <b>GENE ID</b>          | <b>GENE DESCRIPTION</b>           |
| 733007              | 734389                    | <i>WRi_006770</i>       | transposase                       |
| 735447              | 736526                    | <i>WRi_006790</i>       | hypothetical protein              |
| 736739              | 737194                    | <i>WRi_006800</i>       | Small heat shock protein          |
| 737637              | 738647                    | <i>WRi_006810</i>       | ankyrin repeat domain protein     |
| 738683              | 739515                    | <i>WRi_006820</i>       | transposase IS5 family            |
| 741777              | 749201                    | <i>WRi_006850</i>       | ankyrin repeat domain protein     |
| 749574              | 750653                    | <i>WRi_006860</i>       | ankyrin repeat domain protein     |
| 750749              | 753349                    | <i>WRi_006870</i>       | ankyrin repeat domain protein     |
| 754223              | 755143                    | <i>WRi_006880</i>       | patatin family protein            |
| 755153              | 755371                    | <i>WRi_006890</i>       | hypothetical protein              |
| 755496              | 756032                    | <i>WRi_006900</i>       | ankyrin repeat domain protein     |
| 755998              | 756978                    | <i>WRi_006910</i>       | tail protein D putative           |
| <b>CNV LOCATION</b> | <b>COPY NUMBER CHANGE</b> | <b>AFFECTED GENOMES</b> | <b>KOLMOGOROV-SMIRNOV P-VALUE</b> |
| 1345000-1347500     | 1 → 2                     | wSuz only               | 0.016                             |
| <b>GENE START</b>   | <b>GENE END</b>           | <b>GENE ID</b>          | <b>GENE DESCRIPTION</b>           |
| 1345028             | 1345492                   | <i>WRi_012540</i>       | baseplate assembly protein V      |
| 1345769             | 1347103                   | <i>WRi_012560</i>       | transposase                       |

1  
2

A

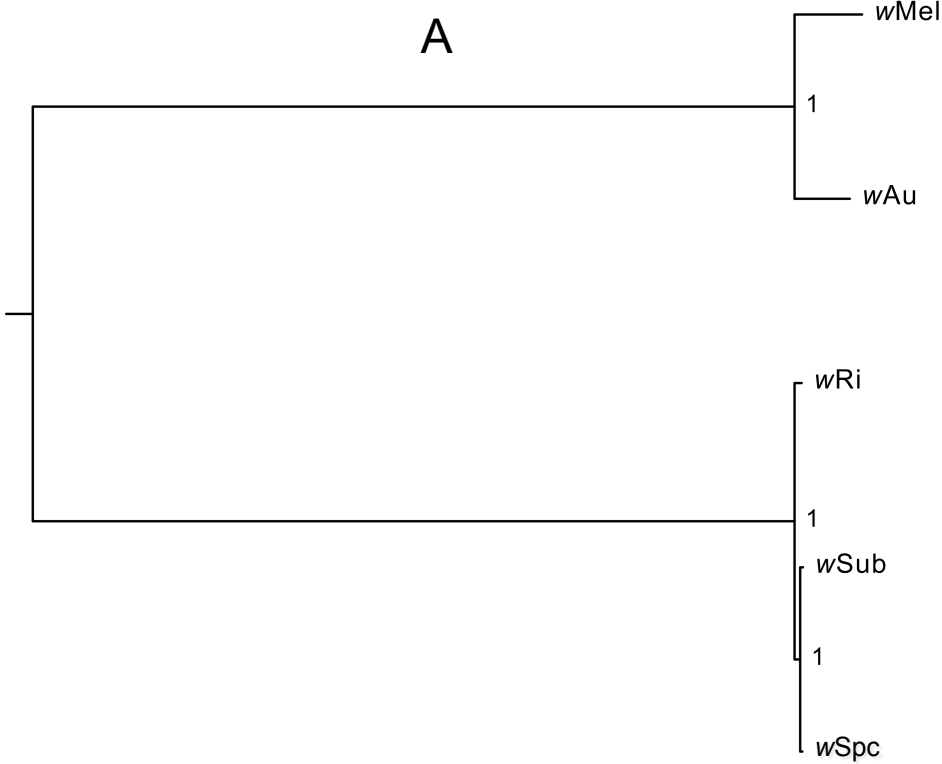

B

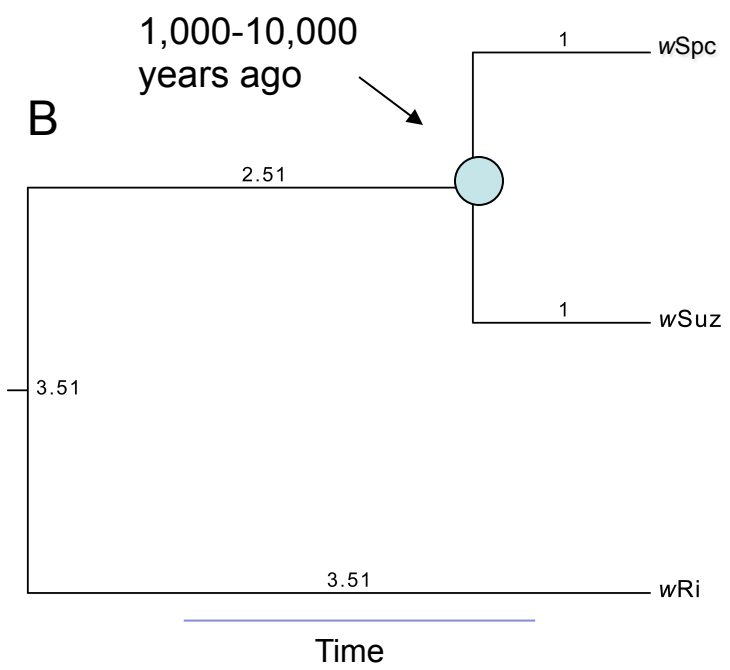

C

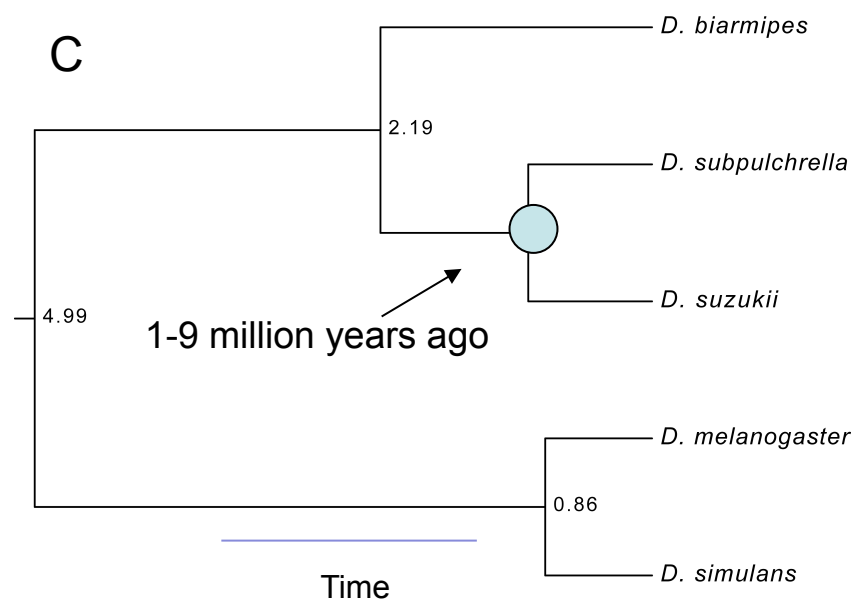

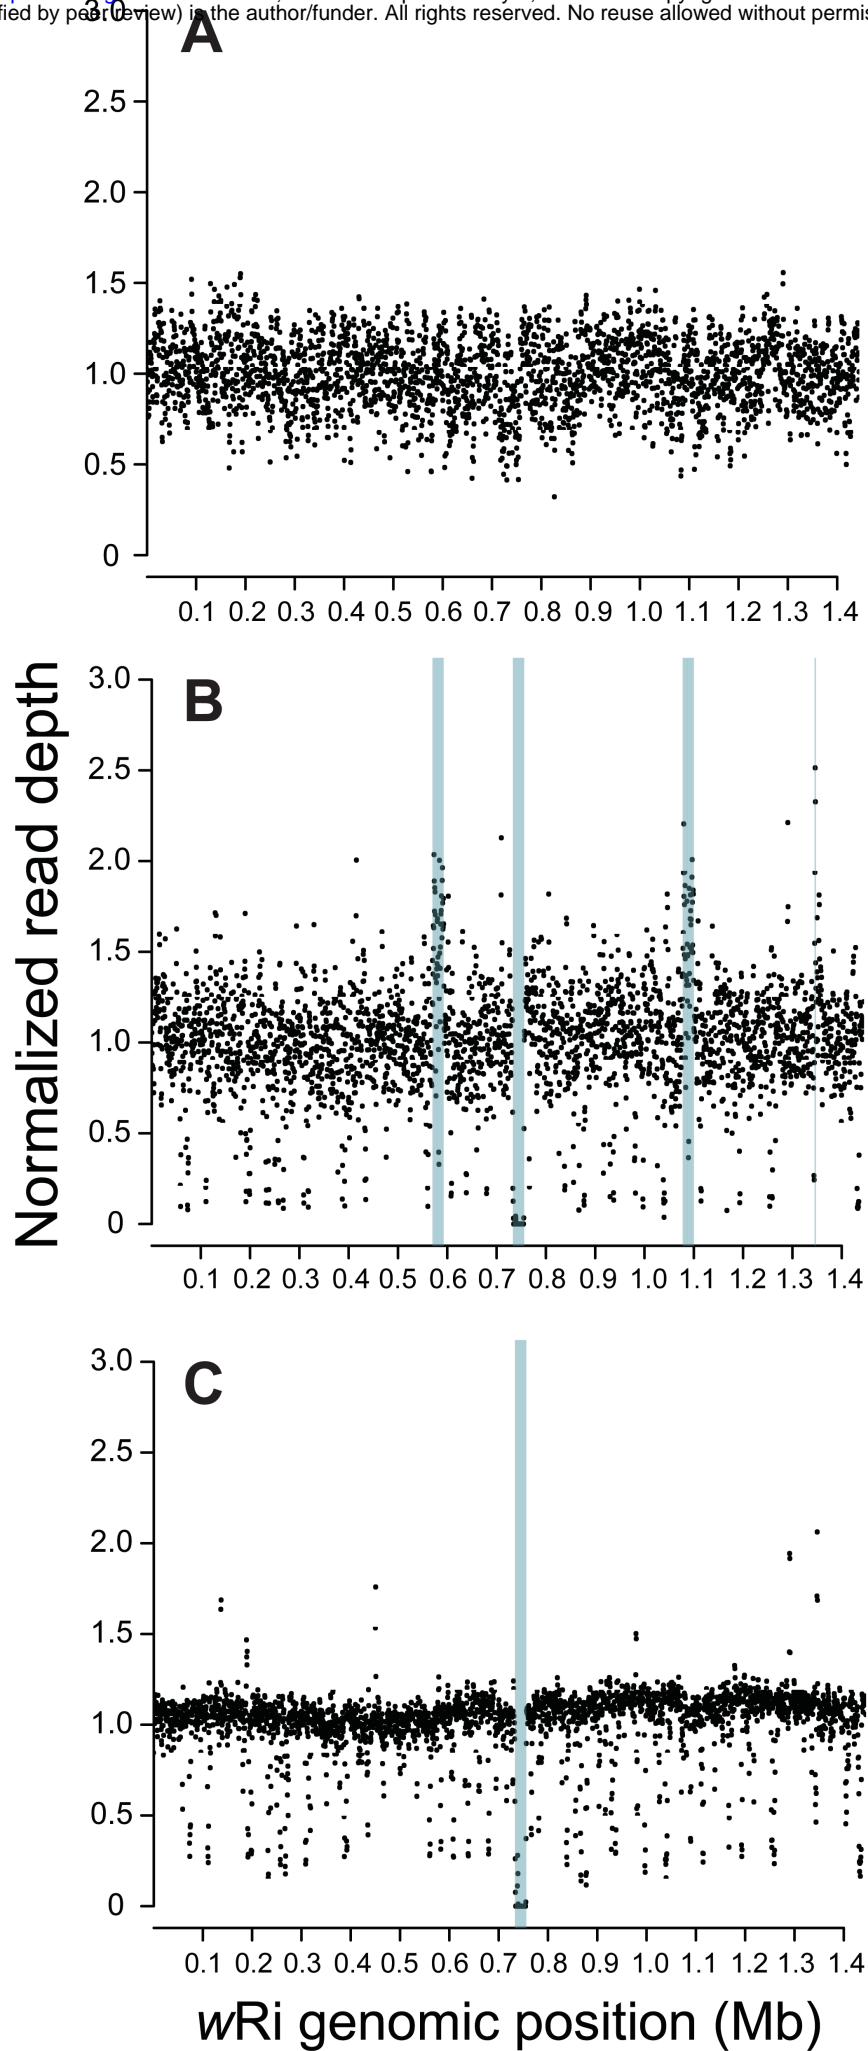

Source: http://biorxiv.org/content/10.1101/135475v1.full.pdf
